# Supplementary material for: Using Sigmoid Growth Curves to Establish Growth Models of Tomato and Eggplant Stems Suitable for Grafting in Subtropical Countries
Source: MDPI journal article supplement (doi:10.3390/horticulturae7120537), 2021-12-02
Supplement: s1 [file s1]

## Supplementary Materials

**Table S1.** Descriptive statistics of the environmental parameters of each data set used in this study (information presented separately by year). Values are presented as means (standard deviations).

| Data set      | Year | Eggplant  |           |                                                             | Tomato    |           |                                                             |
|---------------|------|-----------|-----------|-------------------------------------------------------------|-----------|-----------|-------------------------------------------------------------|
|               |      | T<br>(°C) | RH<br>(%) | Light intensity<br>( $\mu\text{mol m}^{-2} \text{s}^{-1}$ ) | T<br>(°C) | RH<br>(%) | Light intensity<br>( $\mu\text{mol m}^{-2} \text{s}^{-1}$ ) |
| Spring-summer | 2018 | 28.18     | 81.57     | 72.91                                                       | 28.18     | 81.57     | 72.91                                                       |
|               |      | (1.79)    | (5.51)    | (26.96)                                                     | (1.79)    | (5.51)    | (26.96)                                                     |
|               | 2019 | 25.01     | 83.55     | 90.13                                                       | 25.01     | 83.55     | 90.13                                                       |
|               |      | (1.95)    | (3.99)    | (29.12)                                                     | (1.95)    | (3.99)    | (29.12)                                                     |
|               | 2020 | 26.60     | 79.15     | 85.73                                                       | 27.25     | 79.96     | 86.79                                                       |
|               |      | (3.32)    | (5.68)    | (24.08)                                                     | (2.87)    | (6.12)    | (22.34)                                                     |
| Autumn-winter | 2018 | 23.72     | 77.55     | 56.98                                                       | 23.72     | 77.55     | 56.98                                                       |
|               |      | (2.23)    | (6.31)    | (17.15)                                                     | (2.23)    | (6.31)    | (17.15)                                                     |
|               | 2019 | 24.55     | 78.46     | 71.29                                                       | 23.64     | 79.17     | 67.67                                                       |
|               |      | (3.10)    | (5.95)    | (28.77)                                                     | (2.94)    | (6.28)    | (24.09)                                                     |
|               | 2020 | 22.68     | 78.70     | 38.24                                                       | 22.42     | 78.31     | 39.17                                                       |
|               |      | (1.87)    | (5.61)    | (9.96)                                                      | (2.10)    | (4.60)    | (10.01)                                                     |
| Combined      | 2018 | 26.42     | 79.98     | 66.61                                                       | 26.42     | 79.98     | 66.61                                                       |
|               |      | (2.94)    | (6.15)    | (24.79)                                                     | (2.94)    | (6.15)    | (24.79)                                                     |
|               | 2019 | 24.68     | 79.85     | 76.44                                                       | 24.09     | 80.61     | 75.07                                                       |
|               |      | (2.83)    | (5.92)    | (29.94)                                                     | (2.72)    | (5.97)    | (27.80)                                                     |
|               | 2020 | 25.28     | 79.00     | 69.78                                                       | 25.67     | 79.42     | 71.27                                                       |
|               |      | (3.45)    | (5.64)    | (30.39)                                                     | (3.48)    | (5.70)    | (29.50)                                                     |

RH: relative humidity; T: temperature.

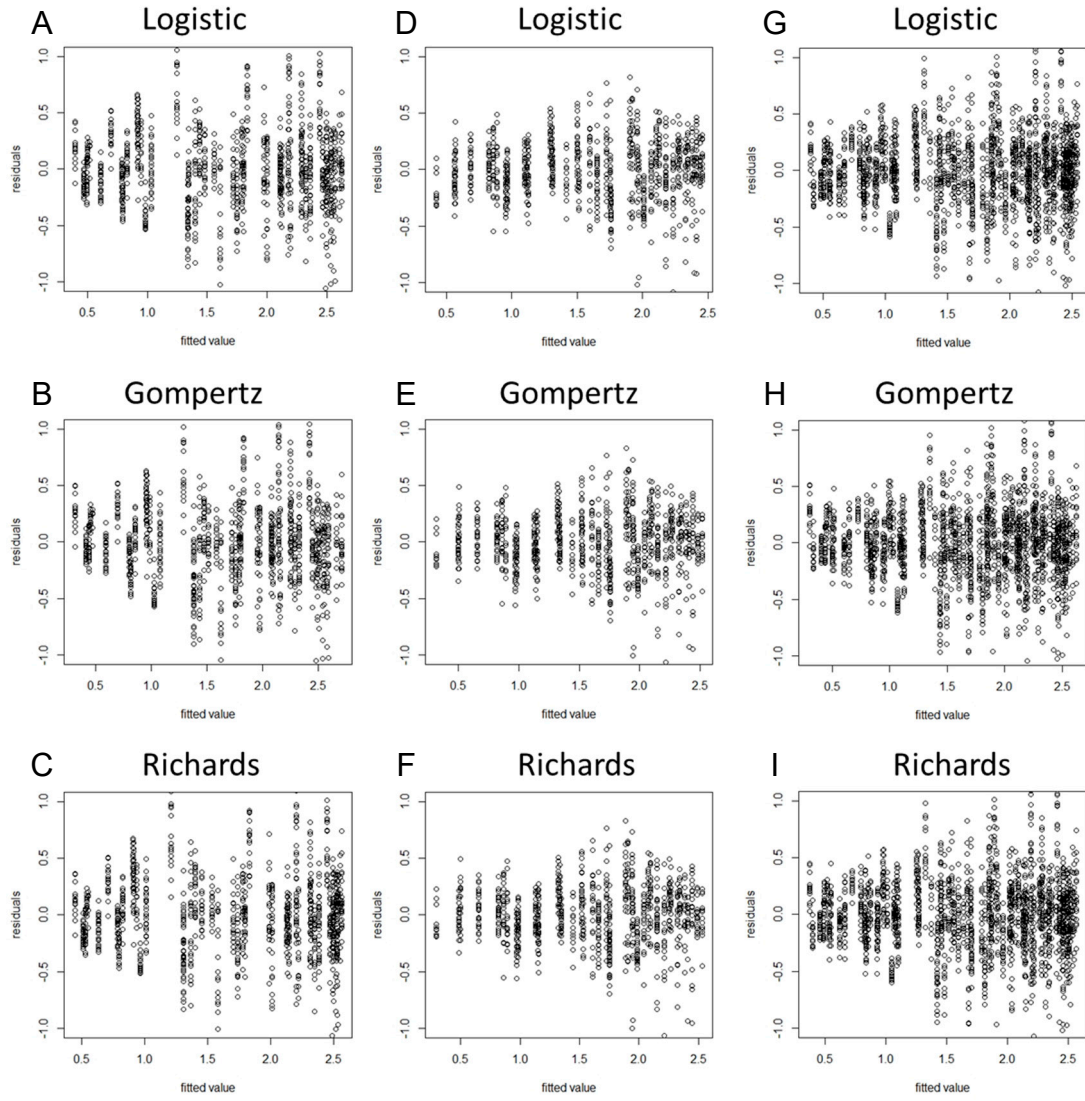

**Figure S1.** Residual plots of eggplant stem diameter (untransformed) by using spring-summer, autumn-winter, and combined data with the Logistic, Gompertz, and Richards growth models. (A) Spring-summer logistic model; (B) spring-summer Gompertz model; (C) spring-summer Richards model; (D) autumn-winter logistic model; (E) autumn-winter Gompertz model; (F) autumn-winter Richards model; (G) global logistic model; (H) global Gompertz model; (I) global Richards model.

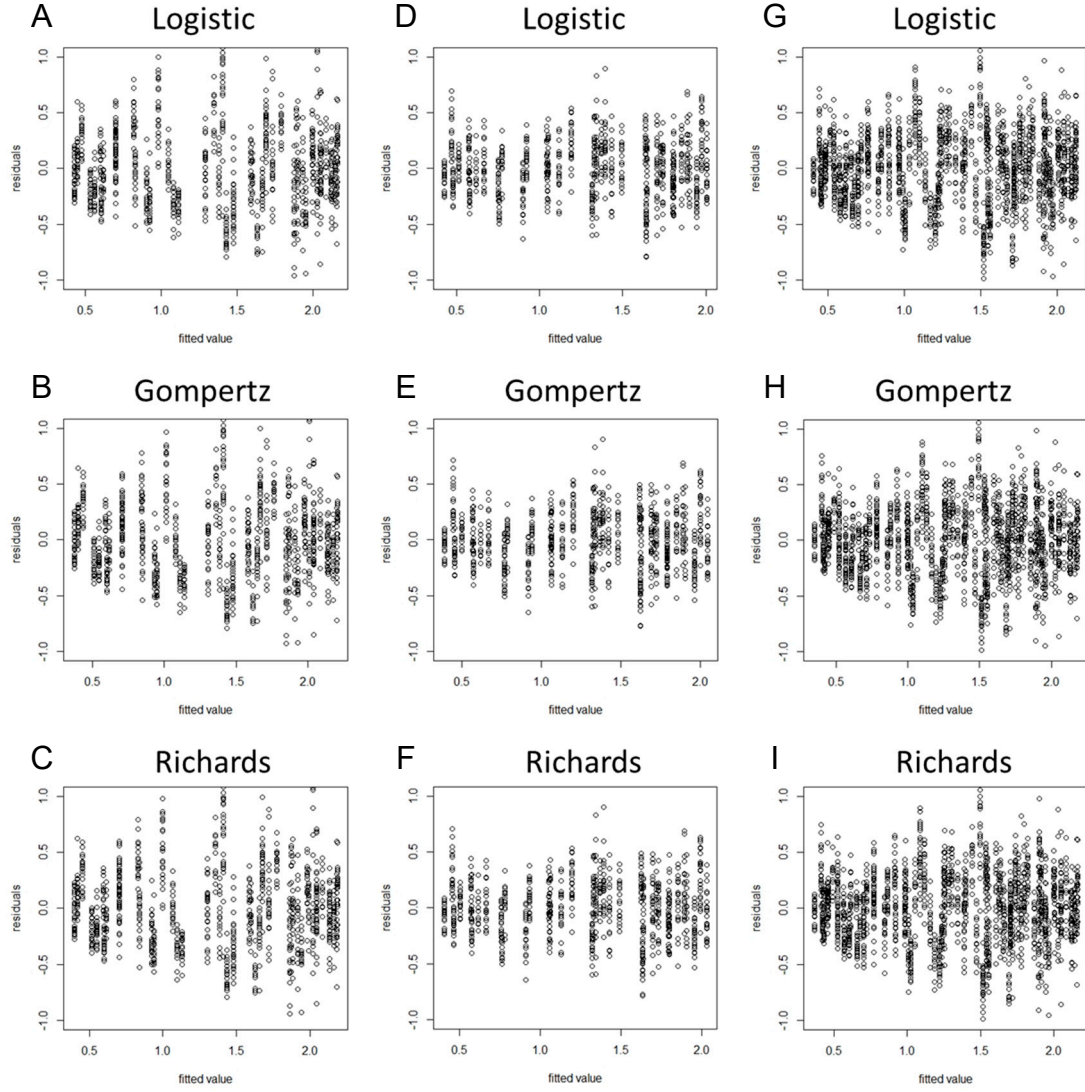

**Figure S2.** Residual plots of tomato stem diameter (untransformed) by using spring-summer, autumn-winter, and combined data with the Logistic, Gompertz, and Richards growth models. (A) Spring-summer logistic model; (B) spring-summer Gompertz model; (C) spring-summer Richards model; (D) autumn-winter logistic model; (E) autumn-winter Gompertz model; (F) autumn-winter Richards model; (G) global logistic model; (H) global Gompertz model; (I) global Richards model.
